# Supplementary material
Source: MDPI journal article supplement (https://www.mdpi.com/2079-6412/12/4/436)
Supplement: s1 [file s1]

# Supplementary Materials: Effect of $\beta$ -Estradiol on Mono- and Mixed-Species Biofilms of Human Commensal Bacteria *Lactobacillus Paracasei* AK508 and *Micrococcus Luteus* C01 on Different Model Surfaces

Anastasia A. Kiseleva <sup>1</sup>, Tatiana V. Solovyeva <sup>1</sup>, Maria A. Ovcharova <sup>1</sup>, Olga V. Geras'kina <sup>2</sup>, Sergey V. Mart'yanov <sup>1</sup>, Tatiana A. Cherdyntseva <sup>2</sup>, Natalya D. Danilova <sup>1</sup>, Marina V. Zhurina <sup>1</sup>, Ekaterina A. Botchkova <sup>1</sup>, Alexey V. Feofanov <sup>2,3</sup>, Vladimir K. Plakunov <sup>1</sup> and Andrei V. Gannesen <sup>1,\*</sup>

<sup>1</sup> Federal Research Center "Fundamentals of Biotechnology", Russian Academy of Sciences, Moscow 117312, Russia; anastkslv99@mail.ru (A.A.K.); solovyeva1944@mail.ru (T.V.S.); masha\_ovcharova\_97@mail.ru (M.A.O.); semartyan@inbox.ru (S.V.M.); leo\_523@mail.ru (N.D.D.); mzhurik@gmail.com (M.V.Z.); botchkovaekat@gmail.com (E.A.B.); plakunov@inmi.ru (V.K.P.)

<sup>2</sup> Faculty of Biology, Lomonosov Moscow State University, Moscow 119234, Russia; olgsamsonova@yandex.ru (O.V.G.); taniacherd@yandex.ru (T.A.C.); avfeofanov@yandex.ru (A.V.F.)

<sup>3</sup> Shemyakin-Ovchinnikov Institute of Bioorganic Chemistry, Russian Academy of sciences, Moscow 117997, Russia

\* Correspondence: a.gannesen@fbras.ru or andrei.gannesen@gmail.com

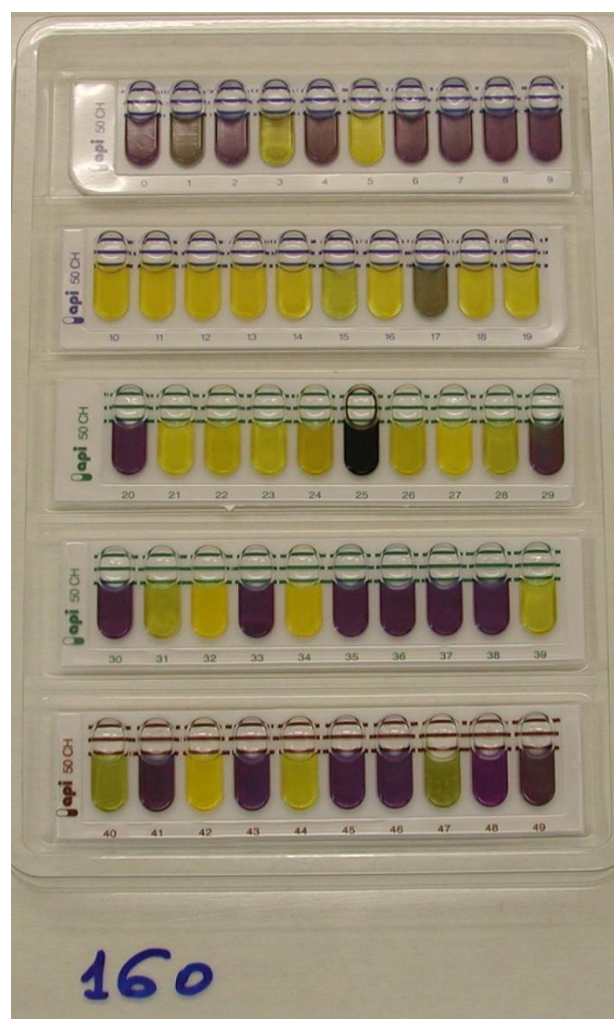

**Figure S1.** The API test of *L. paracasei* AK508. The list of compounds is presented in the Table S1.

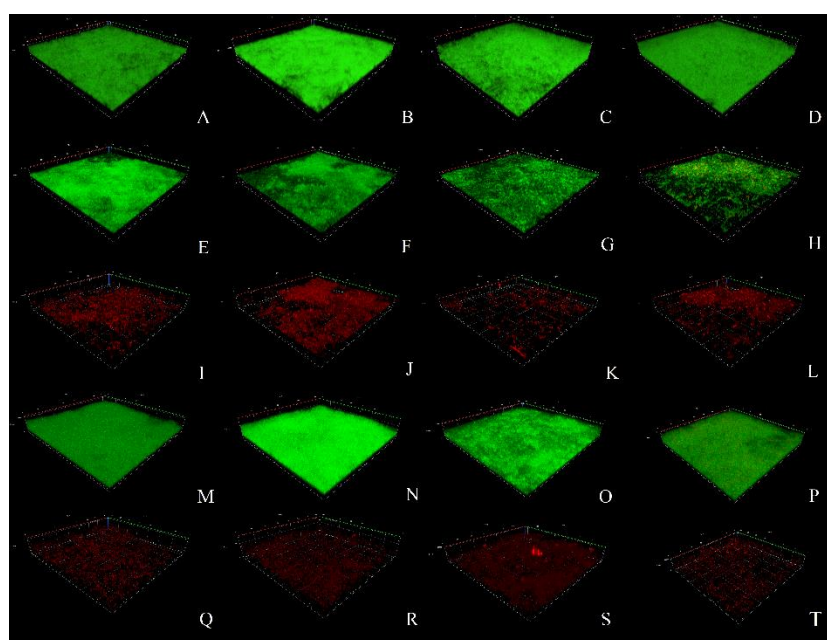

**Figure S2.** The CLSM images of monospecies (A–L) and mixed-species (M–T) biofilms of *M. luteus* and *L. paracasei*. A–D – monospecies biofilms of *M. luteus* stained with SYTO9, E–L – monospecies biofilms of *L. paracasei* stained with SYTO9 (E–H) and the FISH probe with R6G (I–L). M–T – mixed-species biofilms stained with SYTO9 (M–P) and the FISH probe with R6G (Q–T). A, E, I, M, Q – control samples, B, F, J, N, R – ethanol samples, C, G, K, O, S – estradiol  $2.2 \times 10^{-10}$  M; D, H, L, P, T –  $2.2 \times 10^{-8}$  M.

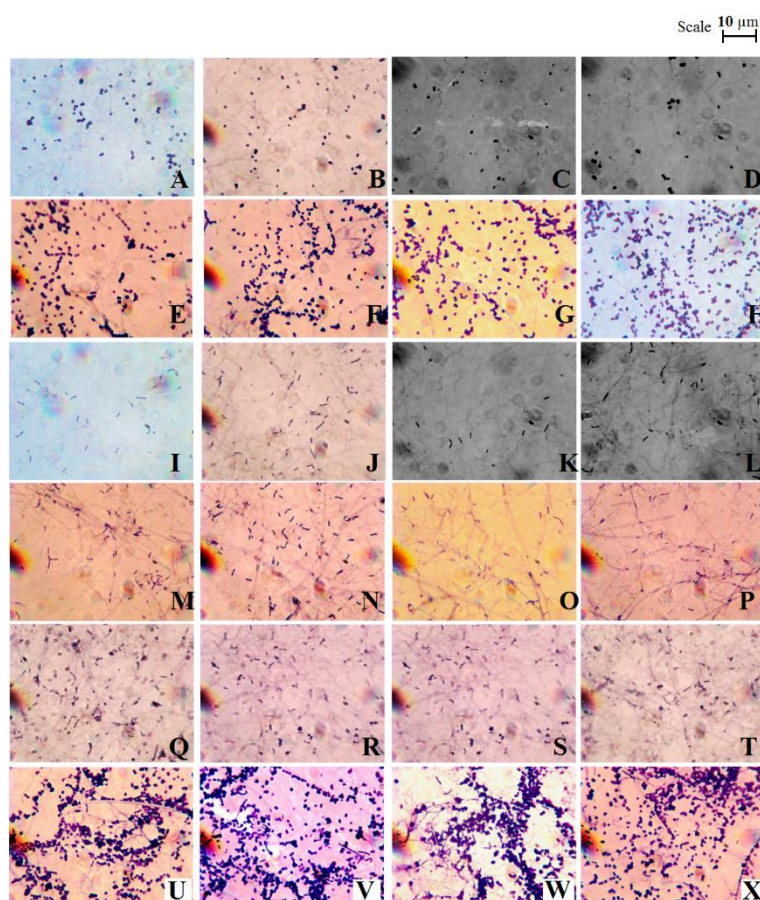

**Figure S3.** Representative images of the samples of monospecies *M. luteus* biofilms (A–H), monospecies *L. paracasei* biofilms (I–P) and mixed-species biofilms (Q–X) for aggregation assessment in the system with tubes (A–D, I–L, Q–T) and on the solid medium in Petri dishes (E–H, M–P, U–X).

A,E,I,M,Q,U – control samples, B,F,J,N,R,V – ethanol samples, C,G,K,O,S,W – estradiol  $2.2 \times 10^{-10}$  M, D,H,L,P,T,X – estradiol  $2.2 \times 10^{-8}$  M.

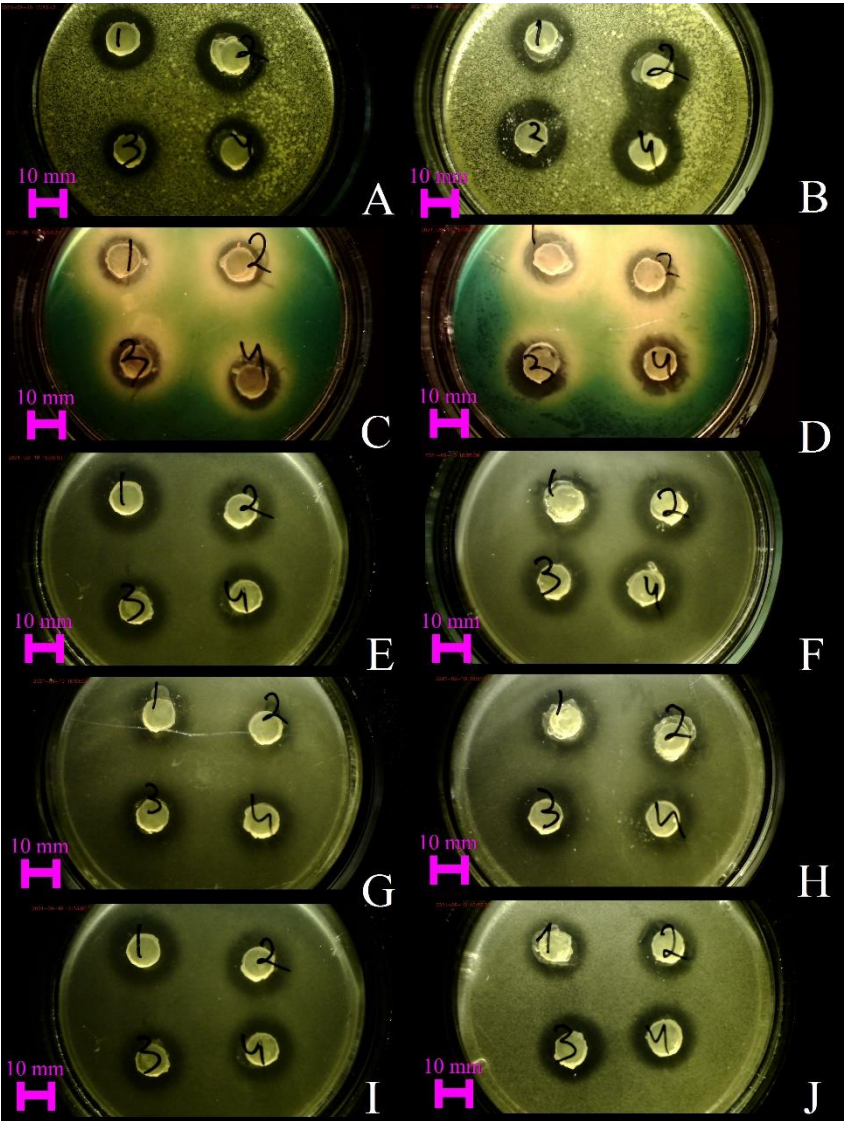

**Figure S4.** The images of inhibition zones around the agar blocks with *L. paracasei* grown areobically (A,C,E,G,I) and anaerobically (B,D,F,H,J). A,B – *M. luteus*, C,D – *P. aeruginosa* PAO1, E,F – *Escherichia coli* K12, G,H – *Staphylococcus aureus* 209P, I,J – *Staphylococcus epidermidis* ATCC14990. 1 – control, 2 – ethanol, 3 – estradiol  $2.2 \times 10^{-8}$  M, 4 – estradiol  $2.2 \times 10^{-10}$  M.

**Table S1.** API test of *L. paracasei* AK508. Red label is for differences between strain AK508 and type strain R094.

| No.              | 0  | 1        | 2          | 3            | 4            | 5        | 6         | 7         | 8           | 9                          | 10          | 11        | 12         | 13        | 14        | 15         | 16       | 17       | 18         | 19         | 20                         | 21                          | 22                   | 23        | 24      |
|------------------|----|----------|------------|--------------|--------------|----------|-----------|-----------|-------------|----------------------------|-------------|-----------|------------|-----------|-----------|------------|----------|----------|------------|------------|----------------------------|-----------------------------|----------------------|-----------|---------|
| <b>Time/</b>     | 24 | -        | -          | -            | +            | -        | +         | -         | -           | -                          | -           | +         | +          | +         | +         | +          | +        | -        | +          | +          | -                          | +                           | +                    | +         | +       |
| <b>h</b>         | 48 | -        | -          | -            | +            | -        | +         | -         | -           | -                          | -           | +         | +          | +         | +         | +          | +        | -        | +          | +          | -                          | +                           | +                    | +         | +       |
| <b>Substrate</b> | O  | Glycerol | Erythritol | D-ara binose | L-ara binose | D-ribose | D-xyl ose | L-xyl ose | D-ado nitol | Meth yl-β-D-xylopyranoside | D-galactose | D-glucose | D-fructose | D-mannose | L-sorbose | L-rhamnose | Dulcitol | Inositol | D-mannitol | D-sorbitol | Methyl-α-D-mannopyranoside | Met hyl-α-D-glucopyranoside | N-acetyl glucosamine | Amygdalin | Arbutin |



| No.       | 25                                           | 26          | 27                       | 28                    | 29                               | 30                      | 31                    | 32                      | 33         | 34                   | 35                | 36                         | 37               | 38          | 39                      | 40                     | 41               | 42                     | 43               | 44               | 45                 | 46                 | 47                                     | 48                                                | 49                                                |
|-----------|----------------------------------------------|-------------|--------------------------|-----------------------|----------------------------------|-------------------------|-----------------------|-------------------------|------------|----------------------|-------------------|----------------------------|------------------|-------------|-------------------------|------------------------|------------------|------------------------|------------------|------------------|--------------------|--------------------|----------------------------------------|---------------------------------------------------|---------------------------------------------------|
| Time/     | 24                                           | +           | +                        | +                     | +                                | -                       | -                     | -                       | +          | -                    | +                 | -                          | -                | -           | +                       | -                      | -                | +                      | -                | +                | -                  | -                  | ?                                      | -                                                 | -                                                 |
| h         | 48                                           | +           | +                        | +                     | +                                | -                       | -                     | +                       | +          | -                    | +                 | -                          | -                | -           | +                       | ?                      | -                | +                      | -                | +                | -                  | -                  | ?                                      | -                                                 | -                                                 |
| Substrate | Esc<br>uli<br>n<br>ferr<br>ic<br>citr<br>ate | Sali<br>cin | D-<br>cell<br>obi<br>ose | D-<br>mal<br>tos<br>e | D-<br>lact<br>(bo<br>vin<br>ose) | D-<br>mel<br>ybi<br>ose | D-<br>suc<br>ros<br>e | D-<br>tre<br>gal<br>ose | Inul<br>in | D-<br>melez<br>itose | D-<br>raff<br>ino | Ami<br>don<br>(star<br>ch) | Gly<br>cog<br>en | Xyl<br>itol | Ge<br>ntio<br>bio<br>se | D-<br>tur<br>ano<br>se | D-<br>lyx<br>ose | D-<br>tag<br>atos<br>e | D-<br>fuc<br>ose | L-<br>fuc<br>ose | D-<br>arabi<br>tol | L-<br>arab<br>itol | Pota<br>ssiu<br>m<br>gluc<br>onat<br>e | Pota<br>ssiu<br>m 2-<br>keto<br>gluc<br>onat<br>e | Pota<br>ssiu<br>m 5-<br>keto<br>gluc<br>onat<br>e |
